# Supplementary material
Source: MDPI journal article supplement (https://www.mdpi.com/2073-4441/14/21/3383)
Supplement: s1 [file s1 › water-1970822-supplementary.pdf]

## Supplementary material

### *Physicochemical parameters in the generation of turbidity episodes in a supply water distribution system*

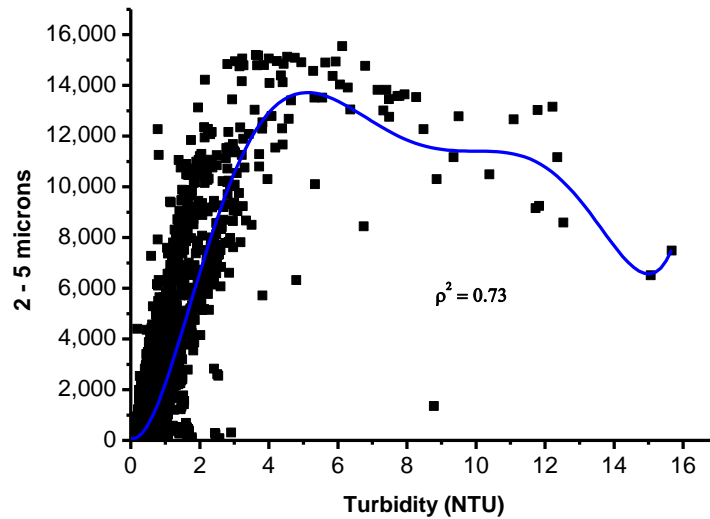

**Figure S1.** Graph of the number of particles/ml from 2 to 5 microns with respect to turbidity.

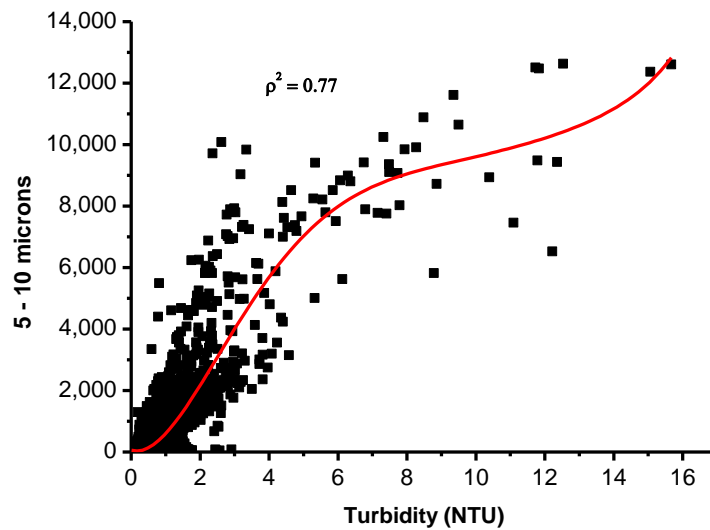

**Figure S2.** Graph of the number of particles/ml from 5 to 10 microns with respect to turbidity.

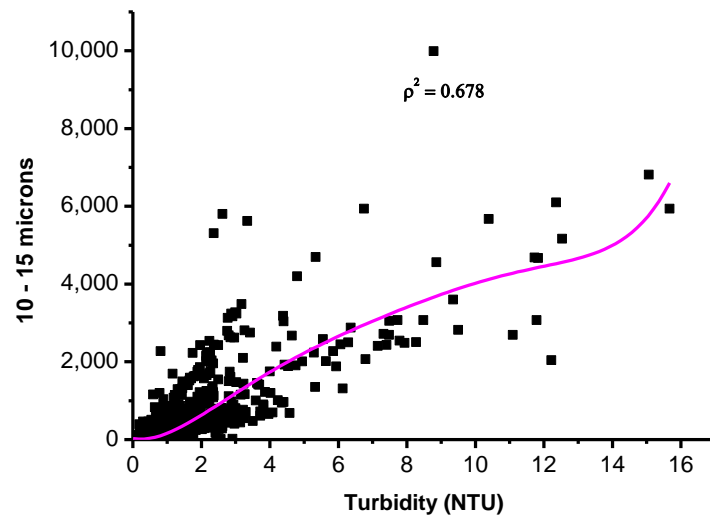

**Figure S3.** Graph of the number of particles/ml from 10 to 15 microns with respect to turbidity.

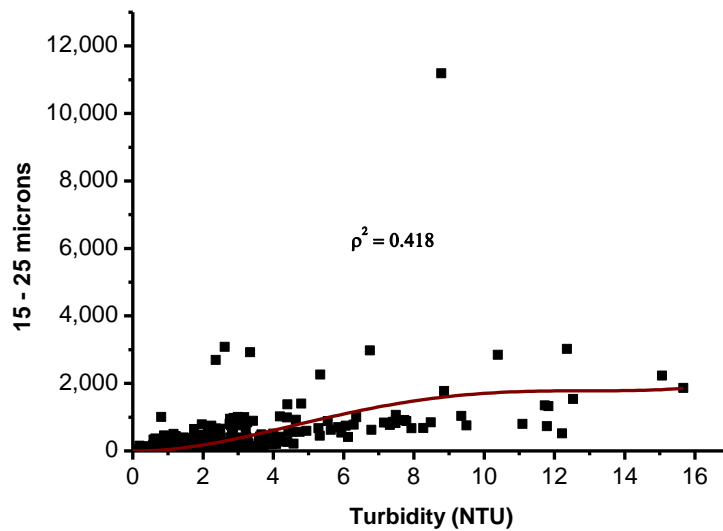

**Figure S4.** Graph of the number of particles/ml from 15 to 25 microns with respect to turbidity.

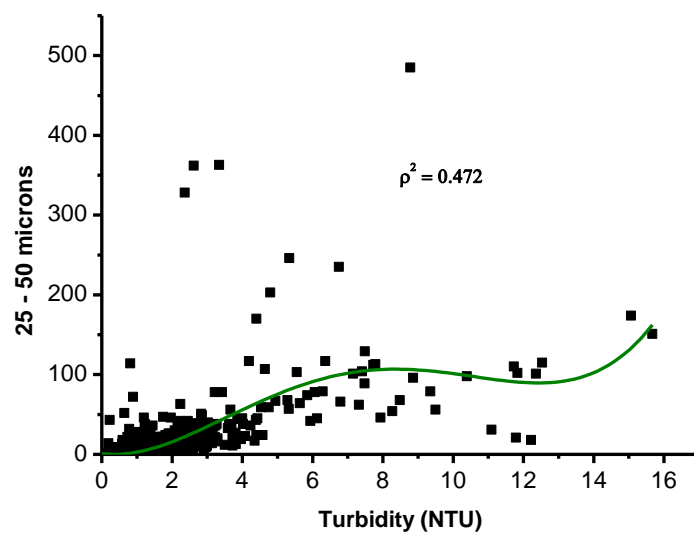

**Figure S5.** Graph of the number of particles/ml from 25 to 50 microns with respect to turbidity.

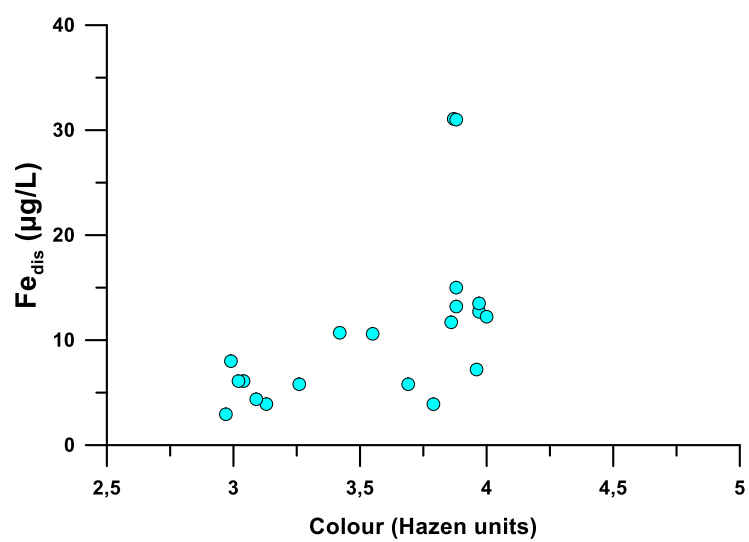

**Figure S6.** Graph of colour with respect to the dissolved Fe concentration.

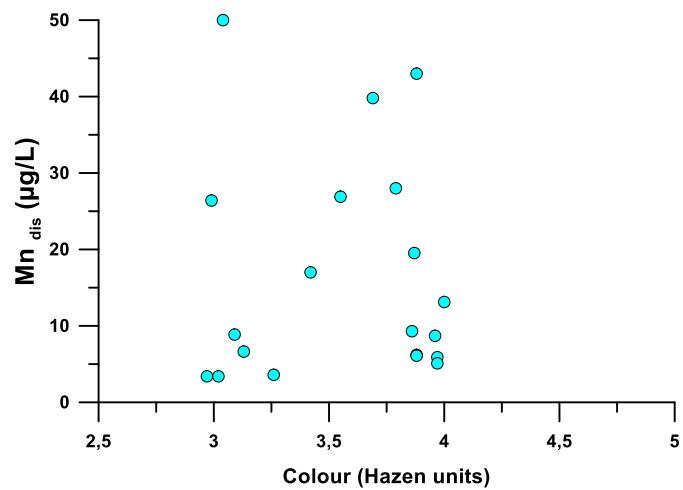

**Figure S7.** Graph of colour with respect to the dissolved Mn concentration.

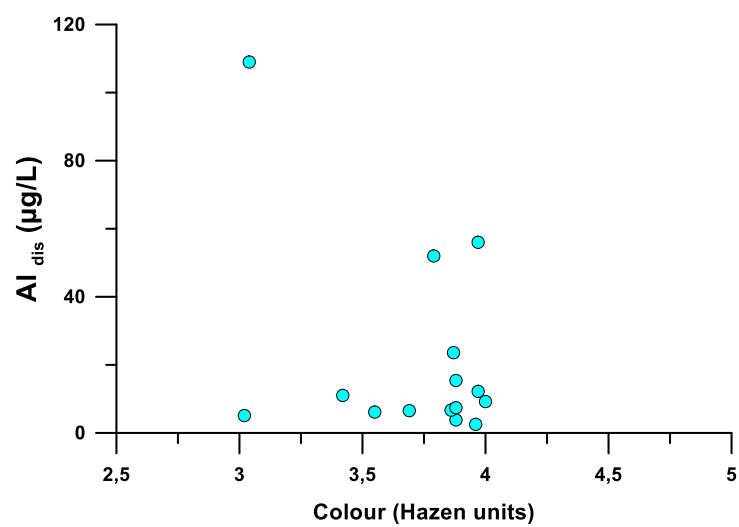

**Figure S8.** Representation of the colour with respect to the dissolved Al concentration.

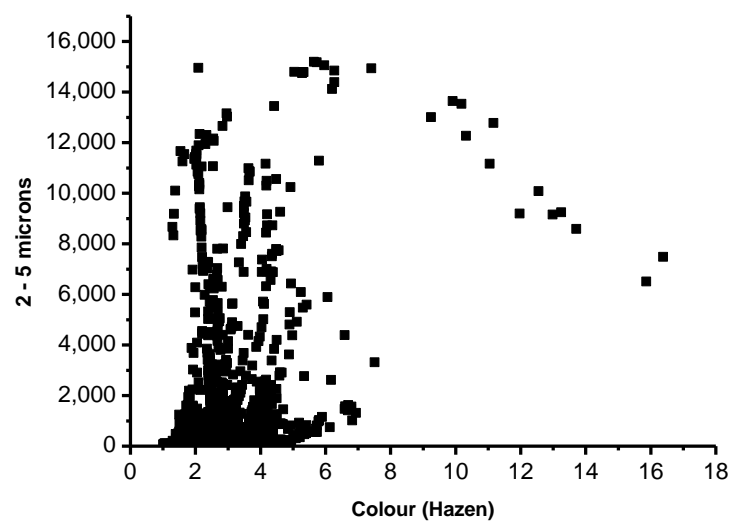

**Figure S9.** Graph of the number of particles/ml from 2 to 5 microns with respect to colour.

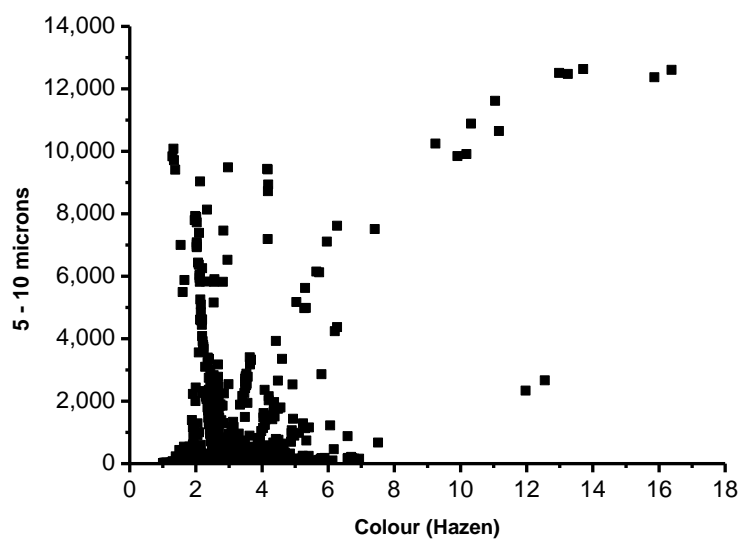

**Figure S10.** Graph of the number of particles/ml from 5 to 10 microns with respect to colour.

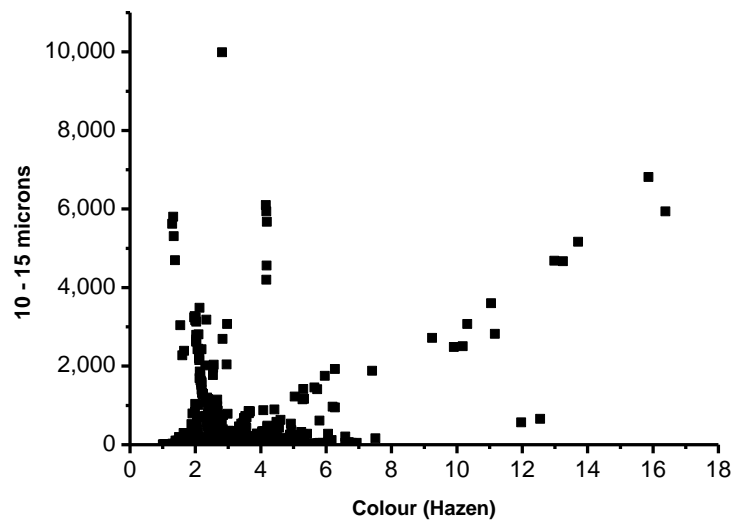

**Figure S11.** Graph of the number of particles/ml from 10 to 15 microns with respect to colour.

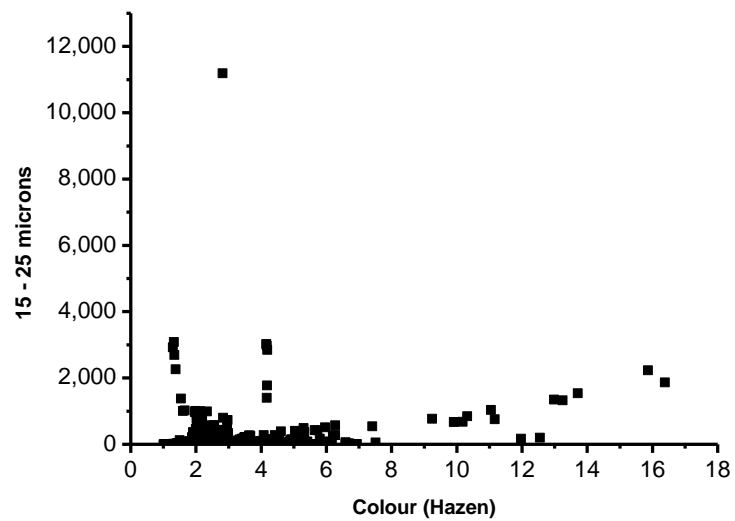

**Figure S12.** Graph of the number of particles/ml from 15 to 25 microns with respect to colour.

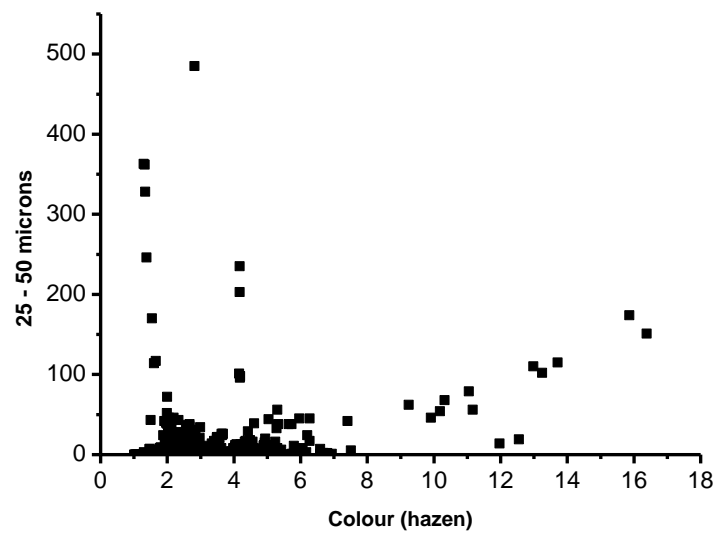

**Figure S13.** Graph of the number of particles/ml from 25 to 50 microns with respect to colour.

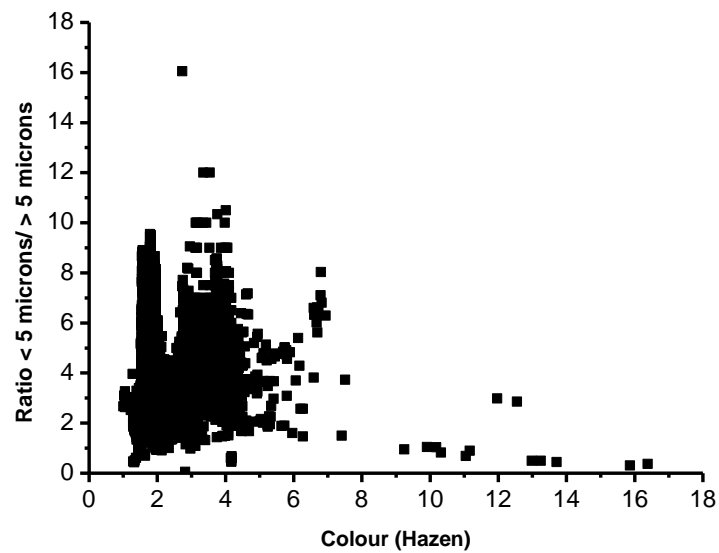

**Figure S14.** Graph of the ratio of the number of particles/ml less than 5 microns to the number of particles/ml greater than 5 microns with respect to colour.

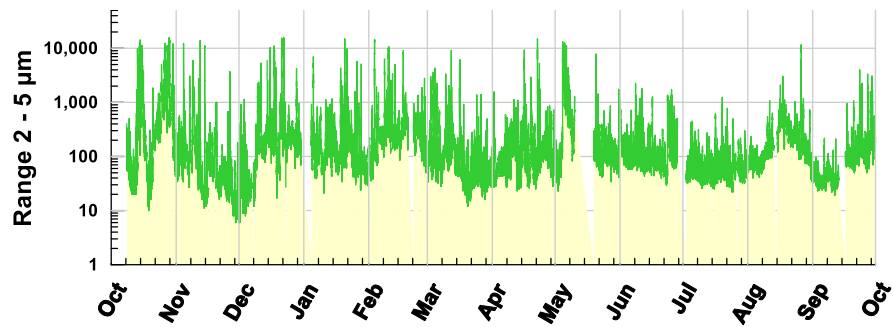

**Figure S15.** Time evolution of the number of particles/ml from 2 to 5 microns. 2020/2021.

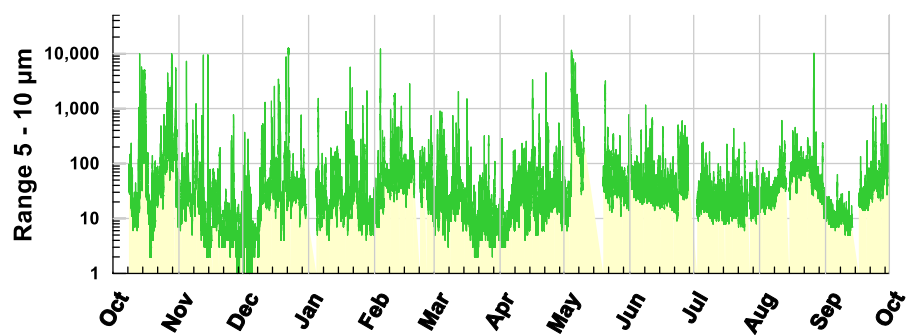

**Figure S16.** Time evolution of the number of particles/ml from 5 to 10 microns. 2020/2021.

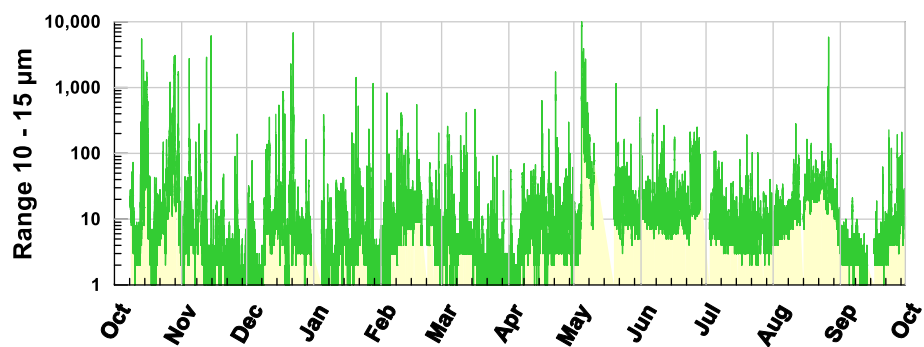

**Figure S17.** Time evolution of the number of particles/ml from 10 to 15 microns. 2020/2021.

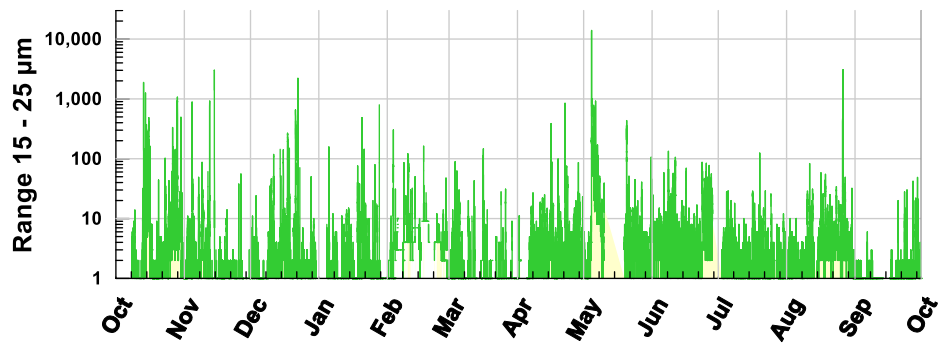

**Figure 18.** Time evolution of the number of particles/ml from 15 to 25 microns. 2020/2021.

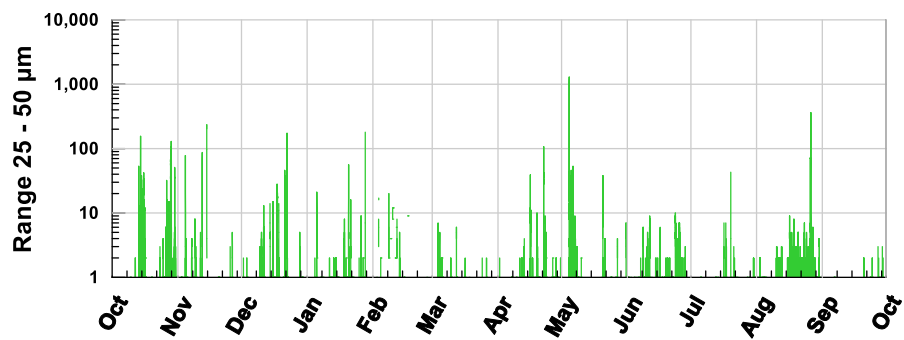

**Figure S19.** Time evolution of the number of particles/ml from 25 to 50 microns. 2020/2021.
